# Supplementary material
Source: PubMed Central journal article supplement (PMC3113668)

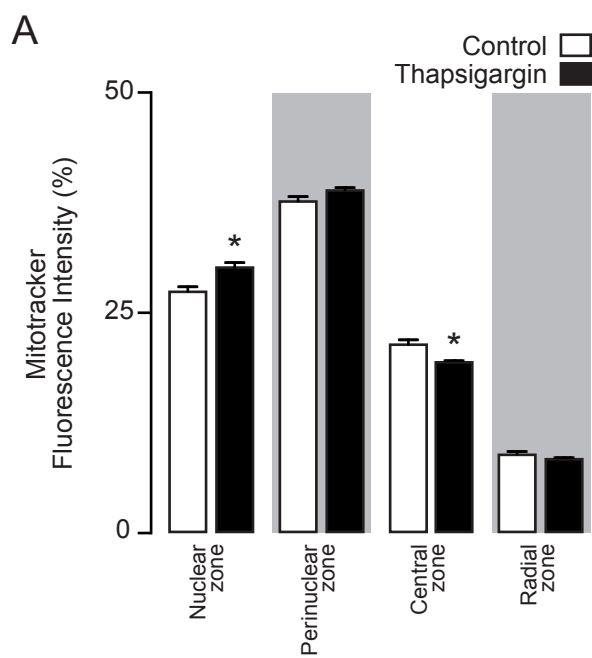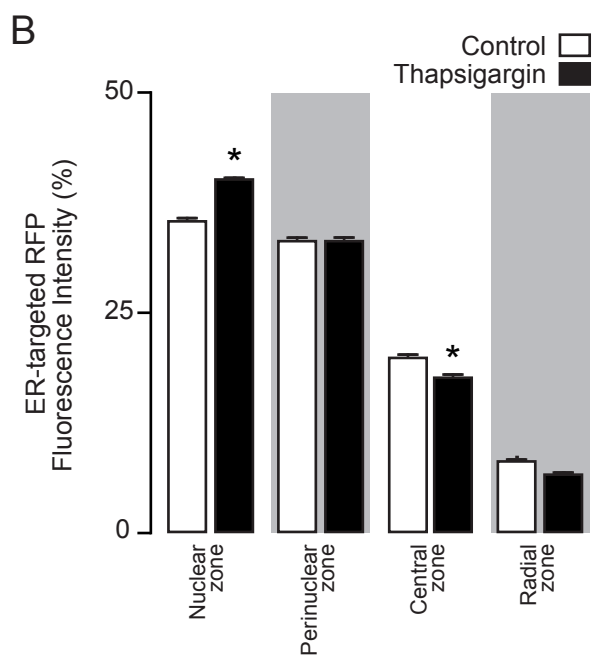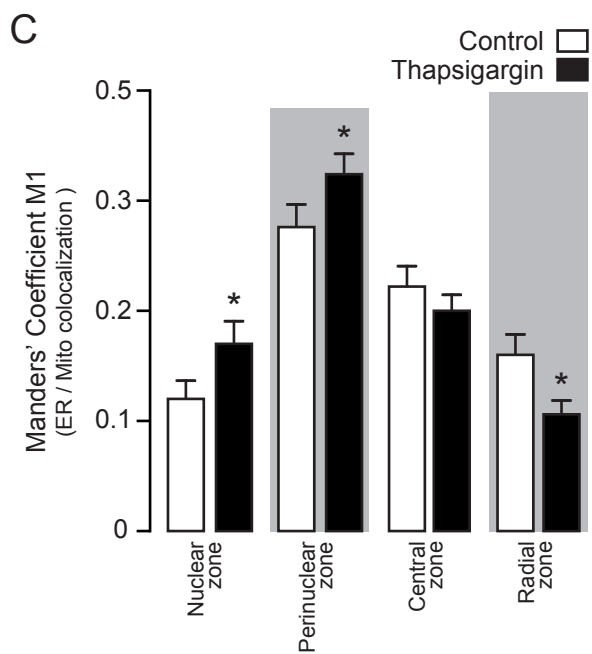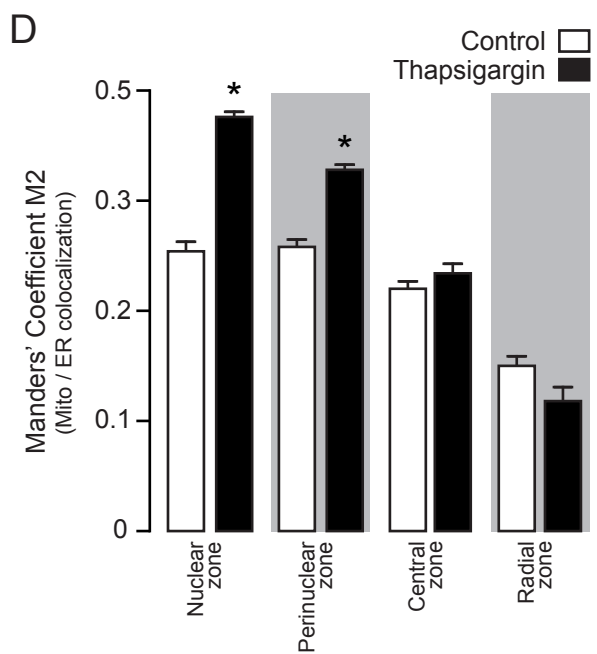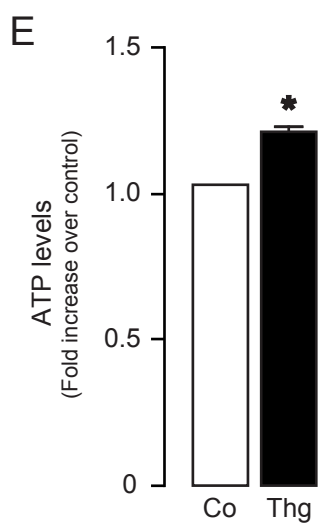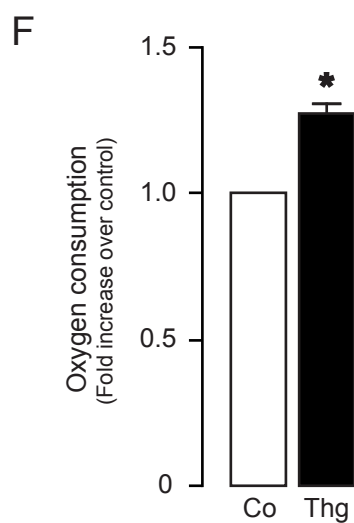

Supplement: supp_jcs.080762_JCS080762FigS1.pdf [file supp_jcs.080762_JCS080762FigS1.pdf]

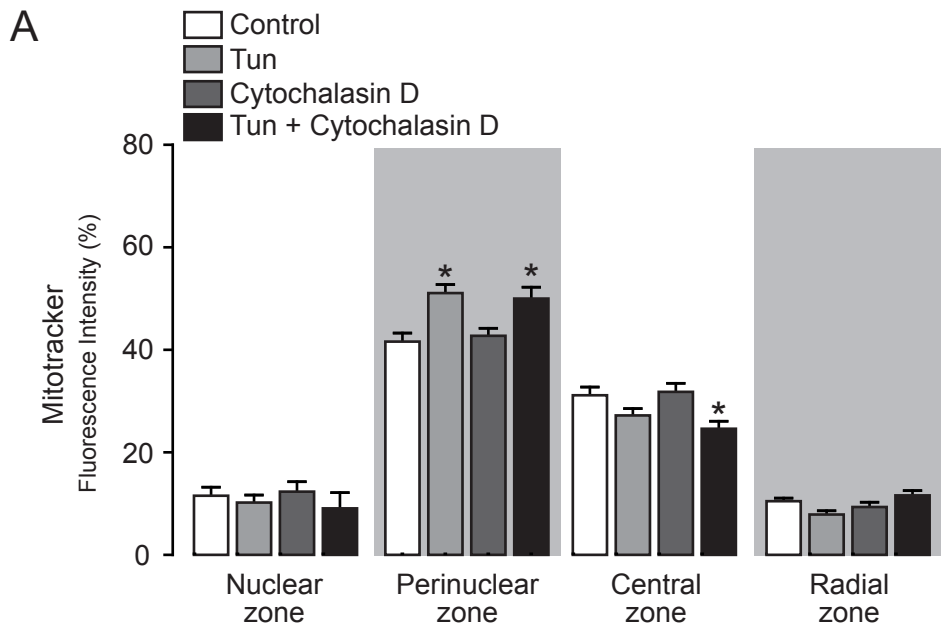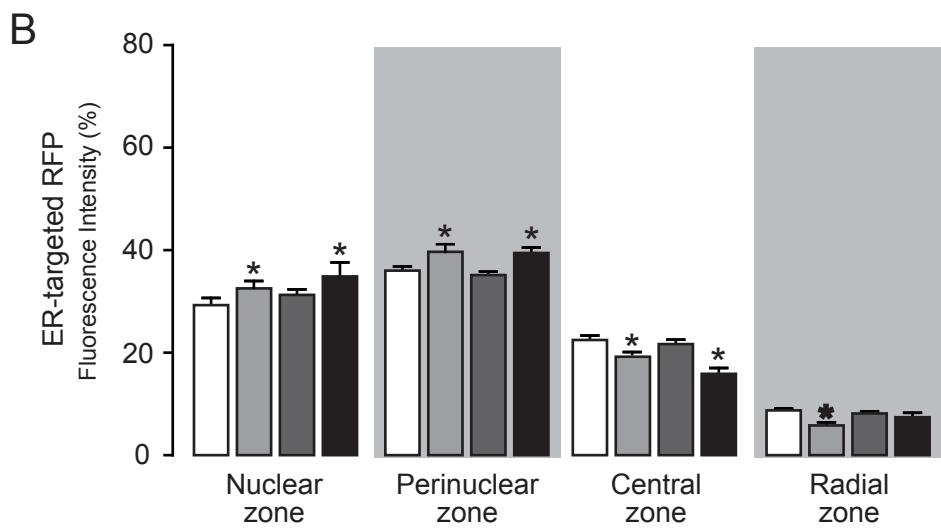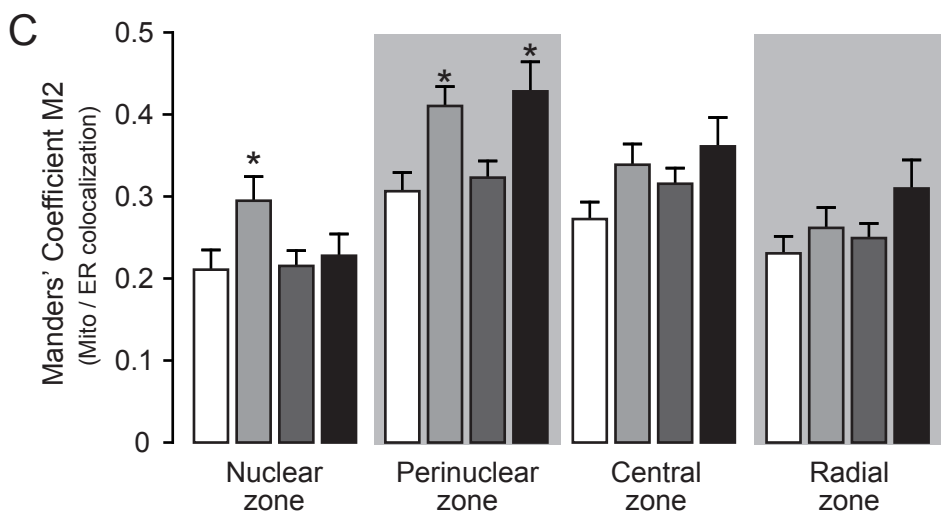

Supplement: supp_jcs.080762_JCS080762FigS2.pdf [file supp_jcs.080762_JCS080762FigS2.pdf]
